# Supplementary material
Source: publisher figshare collection journal article supplement (https://tandf.figshare.com/ndownloader/files/14941139)
Supplement: Supplementary file 1 [file 14941139]

**Prospective Evaluation of a Clinical Decision Tool to Reduce Childhood Admissions to PICUs for Poisoning: ReCAP2**

Jocelyn R. Grunwell, MD, PhD, Courtney McCracken, PhD, Curtis D. Travers, MPH, Robert J. Geller, MD, and Pradip P. Kamat, MD, FCCM, MBA

**SUPPLEMENTAL DATA**

**Supplementary Table 1: Clinically Significant and Non-Clinically Significant Effects**

**Supplementary Table 2: Clinically Significant and Non-Clinically Significant Interventions**

**Supplementary Table 3: Definition of Drug Classification**

**Supplementary Table 1: Clinically Significant and Non-Clinically Significant Effects**

| Organ System | Clinically Significant Intoxication | Non-Clinically Significant Intoxication | |
| --- | --- | --- | --- |
| Cardiac | Asystole  Arrest  Bradycardia  Conduction Disturbance  Dysrhythmia  Hypertension  Hypotension | | Chest Pain  Electrocardiogram Changes  Tachycardia |
| Respiratory | Bronchospasms  Cyanosis  Dyspnea  Pulmonary Edema  Arrest  Depression | | Cough/Choke  Hyperventilation/Tachypnea  Pneumonitis |
| Neurologic | Blurred Vision  Coma  Confusion  Cerebrovascular Accident  Deafness  Dizziness/Vertigo  Dystonia  Hypothermia  Intracranial Bleed  Muscle Weakness  Muscle rigidity  Paralysis  Papilledema  Pupils Nonreactive  Seizure (Multiple/Discrete)  Status Epilepticus  Slurred Speech  Syncope  Visual Defect | | Agitated/Irritable  Ataxia  Corneal Abrasion  Drowsiness/Lethargy  Hallucinations/Delusions  Headache  Fever/Hyperthermia  Miosis  Mydriasis  Numbness  Nystagmus  Peripheral Neuropathy  Photophobia  Pruritus  Seizure (Single)  Tinnitus  Tremor |
| FEN/GIa | Electrolyte Abnormality  Esophageal Injury  Esophageal Stricture  Gastric Burns  Hematemesis  Hypoglycemia  Melena  Oral Burns  Oropharyngeal Edema | | Abdominal Pain  Anorexia  Blood Per Rectum  Constipation  Dehydration  Diarrhea  Dysphagia  Excess Secretions  Fecal Incontinence  Hyperglycemia  Ileus  Melena  Nausea  Oral Irritation  Throat Irritation |
| Renal | Acidosis  Alkalosis  Anion Gap Increased  Hematuria  Hemo/myoglobinuria  Oliguria/Anuria  Osmolal Gap Increased  Oxalate Crystals (Urine)  Polyuria  Renal Failure  Urinary Incontinence  Urinary Retention | | Creatinine Increase  Rhabdomyolysis  Elevated Creatine Phosphokinase  Urine Color Change |
| Hepatic | Bleeding  AST or ALTb > 1,000  Disseminated Intravascular Coagulopathy  Prothrombin Time Prolonged | | AST or ALTb 100-1000  Bilirubin Increased  Other Coagulopathy  Other Liver Function Test Abnormality |
| Miscellaneous | 2nd/3rd Degree Burns  Cytopenia  Diaphoresis  Erythema/Flushed  Fasciculation  Hemolysis  Lacrimation  Necrosis  Pallor | | Bullae  Superficial Burns  Cellulitis  Conjunctivitis  Dermal Irritation/Pain  Ecchymosis  Edema  Fetal Death  Hives/Welts  Multiple Chemical Sensitivities  Ocular Irritation/Pain  Other  Pain (Not Dermal, GI, Ocular)  Rash  Unspecified  Radiographic Findings  Adverse Drug Reaction to Treatment  Puncture/Wound/Sting |

aFluid, Electrolytes, Nutrition and Gastrointestinal

bAST: Aspartate Aminotransferase, ALT: Alanine Aminotransferase

**Supplementary Table 2: Clinically Significant and Non-Clinically Significant Interventions**

| Organ System | Clinically Significant Intoxication | Non-Clinically Significant Intoxication |
| --- | --- | --- |
| Cardiac | Amyl Nitrite  Antiarrhythmic  Antihypertensives  Atropine  Cardioversion  Cardiopulmonary Resuscitation  Pacemaker  Vasopressors |  |
| Respiratory | Bronchoalveolar Lavage  Intubation  Ventilator | Bronchodilators  Fresh Air  Oxygen |
| Neurologic | Neuromuscular blocker  Physostigmine  Pyridoxine  Sedation | Anticonvulsants  Benzodiazepines  Calcium  Flumazenil |
| FEN/GIa | Forced Diuresis  Glucagon  Glucose, > 5%  Insulin  Octreotide | Acidification  Alkalization  Antiemetic  Cathartic  Charcoal (Single and Multiple Doses)  Deferoxamine  Dilute/Irrigate/Washout  Intravenous Fluids  Folate  Food/Snack  Ipecac  Lavage  Other Emetic  Whole Bowel Irrigation |
| Renal | Hemodialysis  Hemoperfusion  Peritoneal Dialysis |  |
| Hepatic | Phytonadione | N-Acetyl Cysteine (Oral and Intravenous) |
| Miscellaneous | 2-Pyridine Aldoxime Methyl Chloride  Ethanol  Ethylenediaminetetraacetic acid  Exchange Transfusion  Extracorporeal Membrane Oxygenation  Extracorporeal Procedure  Fragment Antigen-Binding Fragment  Hydroxocobalamin  Hyperbaric oxygen  Methylene blue  Nalmefene  Penicillamine  Sodium Nitrite  Sodium Thiosulfate  Transplantation | Antibiotics  Antihistamines  Antivenin  Antitoxin  Fomepizole  Naloxone  No Therapy Provided  Observation Only  Other  Other Decontamination  Patient Refused Any Help  Steroids  Succimer  Unknown If Therapy Provided |

aFluid, Electrolytes, Nutrition and Gastrointestinal

**Supplementary Table 3: Definition of Drug Classification**

| Drug Classification | Included Medications/Substances |
| --- | --- |
| Acids | Wall/Floor/Tile/All-Purpose Cleaning Agents: Acids  Hydrofluoric Acid or Bifluoride Wheel Cleaners  Industrial Cleaners: Acids  Miscellaneous Cleaning Agents: Acids  Hydrofluoric Acid  Other Types of Acid  Rust Removers: Acids Other Than Hydrofluoric Acid Types  Borates and/or Boric Acid Pesticides (Excluding Other Uses)  Hydrochloric Acid  Rust Removers: Hydrofluoric Acid  Unknown Types of Acid  Borates or Boric Acid (Excluding Topicals and Pesticides)  Toilet Bowl Cleaners: Acids  Drain Cleaners: Hydrochloric Acid  Drain Cleaners: Sulfuric Acid  Drain Cleaners: Acids  Disinfectants: Phenol  Phenol or Creosotes (Excluding Disinfectants) |
| Alcohols | Automotive Products: Ethylene Glycol (Including Antifreeze)  Automotive Products: Glycol and Methanol Mixtures  Automotive Products: Methanol (Dry Gas, Windshield Washing Solutions, etc.)  Automotive Products: Other Glycols  Ethanol (beverages)  Ethanol (Non-Beverage, Non-Rubbing)  Ethylene Glycol (Excluding Automotive, Aircraft, or Boat Products)  Glass Cleaners: Isopropanol  Hand Sanitizers: Ethanol Based  Isopropanol (Excluding Rubbing Alcohols and Cleaning Agents)  Methanol (Excluding Automotive Products and Cleaning Agents)  Miscellaneous Cleaning Agents: Glycols (Excluding Automotive Products)  Miscellaneous Cleaning Agents: Isopropanol (Excluding Automotive Products and Glass)  Mouthwashes: Ethanol Containing  Rubbing Alcohols: Ethanol without Methyl Salicylate  Rubbing Alcohols: Isopropanol without Methyl Salicylate  Rubbing Alcohols: Isopropanol with Methyl Salicylate  Rubbing Alcohols: Unknown  Other Glycols (Excluding Automotive, Aircraft, or Boat Products)  Other Types of Alcohol  Unknown Types of Alcohol  Wall/Floor/Tile/All-Purpose Cleaning Agents: Isopropanol  Wall/Floor/Tile/All-Purpose Cleaning Agents: Ethanol  Wall/Floor/Tile/All-Purpose Cleaning Agents: Glycols |
| Alkalis | Wall/Floor/Tile/All-Purpose Cleaning Agents: Alkalis  Drain Cleaners: Alkalis  Hair Relaxers (with Other Alkalines)  Industrial Cleaners: Alkalis  Miscellaneous Cleaning Agents: Alkalis  Oven Cleaners: Alkalis  Disc Batteries: Alkaline (MNO2)  Alkalis (Excluding Cleaning Agents, Bleaches, Batteries, and Detergents)  Toilet Bowl Cleaners: Alkalis |
| Anesthetics, Analgesia | Butorphanol  Chloral Hydrate  Dibucaine  Gabapentin  Ketamine and Analogs  Lidocaine  Other Analgesics  Other or Unknown Local and/or Topical Anesthetic  Other Types of Anesthetic  Other Types of Inhalation Anesthetic  Other Types of Sedative/Hypnotic/Anti-Anxiety or Anti-Psychotic Drug  Phenazopyridine  Sleep Aids, Over the Counter Only (Excluding Diphenhydramine)  Unknown Analgesics  Unknown Types of Anesthetic  Unknown Types of Inhalation Anesthetic  Unknown Types of Sedative/Hypnotic/Anti-Anxiety or Anti-Psychotic Drug |
| Antidepressants, Anxiolytics and Antipsychotics | Amitriptyline  Amoxapine  Antidepressants: Type Unknown to Consumer  Atypical Antipsychotics  Bupropion  Buspirone  Citalopram  Clomipramine  Desipramine  Doxepin  Duloxetine  Escitalopram  Fluoxetine  Fluvoxamine  Imipramine  Lithium  Loxapine  Maprotiline  Meprobamate  Mirtazapine  Nefazodone  Nortriptyline  Other Types of Antidepressant  Other Types of Monoamine Oxidase Inhibitor (MAOI)  Other Types of Serotonin Norepinephrine Reuptake Inhibitor (SNRI)  Other Types of Selective Serotonin Reuptake Inhibitor (SSRI)  Other Types of Tricyclic Antidepressant (TCA)  Paroxetine  Phenelzine  Phenothiazines  Protriptyline  Sertraline  Trazodone  Tricyclic Antidepressants (TCA) Formulated with a Benzodiazepine  Tricyclic Antidepressants (TCA) Formulated with a Phenothiazine  Tricyclic Antidepressants (TCA): Type Unknown to Consumer  Venlafaxine |
| Antiepileptic Drugs | Carbamazepine  Fosphenytoin  Lamotrigine  Levetiracetam  Other Types of Anticonvulsant (Excluding Barbiturates)  Other Types of Gamma Aminobutyric Acid Anticonvulsant  Oxcarbazepine  Phenytoin  Primidone  Succinimides  Topiramate  Unknown Types of Anticonvulsant (Excluding Barbiturates)  Valproic Acid  Zonisamide |
| Antihistamines | Antihistamine and/or Decongestant with Dextromethorphan without Phenylpropanolamine  Antihistamine and/or Decongestant without Phenylpropanolamine and Opioid  Diphenhydramine Alone (Over the Counter)  Diphenhydramine Alone (Prescription)  Diphenhydramine /Alone (Unknown if Over the Counter or Prescription)  Other antihistamines alone (excluding cough and cold preparations) |
| Antihyperlipidemics | Antihyperlipidemics |
| Antihypertensives (excluding beta blockers, clonidine and calcium channel blockers) | Alpha Blockers  Hydralazine  Nitroprusside  Antihypertensives (Excluding Diuretics) |
| Anti-infectives | Amantadine  Antimalarials  Antiretrovirals  Iodine or Iodide Containing Antiseptics  Isoniazid  Mercury Containing Antiseptics  Metronidazole  Other Anti-Influenza Agents  Other Types of Anthelmintic  Other Types of Topical Antiseptic  Piperazine  Rifampin  Systemic Antibiotic Preparations (Oral, Intravenous, Intramuscular)  Systemic Antifungal Preparations (Oral, Intravenous, Intramuscular)  Systemic Antiviral Preparations (Oral, Intravenous, Intramuscular)  Topical Antibiotic Preparations (Dermal, Otic, Ophthalmic, Nasal)Unknown Types of Antibiotic Preparation  Topical Antifungal Preparations (Dermal, Otic, Ophthalmic, Nasal)  Unknown Types of Antibiotic Preparation  Unknown Types of Antifungal Preparation  Unknown Types of Antiviral Preparations |
| Anti-inflammatories | Corticosteroids  Leukotriene Antagonist or Inhibitor  Topical Steroids for Eye/Nose/Throat  Topical Steroids (Including Otic, Ophthalmic, and Dermal Preparations) |
| Barbiturates | Long Acting Barbiturates  Short or Intermediate Acting Barbiturates  Unknown Types of Barbiturate |
| Benzodiazepines | Benzodiazepines |
| Beta Blockers | Beta blockers (including all Propranolol cases) |
| Bronchodilators | Albuterol  Non-Selective Beta Agonists  Aminophylline or Theophylline  Terbutaline and Other Beta-2 Agonists  Other Asthma Therapeutic Agents  Unknown Asthma Therapeutic Agents |
| Calcium Channel Blockers | Calcium Antagonists |
| Carbon Monoxide | Carbon Monoxide |
| Cardiovascular Medications | Antiarrhythmics  Nitroglycerin  Long-Acting Nitrates  Cardiac Glycosides  Other Types of Cardiovascular Drug  Unknown Types of Cardiovascular Drug  Unknown Types of Vasodilator  Vasopressors  Other Types of Vasodilator |
| Clonidine | Clonidine |
| Cough/Cold Medications | Cough and Cold Preparations (Not Otherwise Classified)  Dextromethorphan Preparations (Not Otherwise Classified)  Dextromethorphan with Expectorants  Expectorants or Antitussives (Without Narcotics or Narcotic Analogs)  Non-Narcotic Antitussives Excluding Dextromethorphan  Other Nasal Decongestants or Sympathomimetics (Excluding Tetrahydrazoline)  Other Types of Throat Preparation  Throat Lozenges with Local Anesthetics  Throat Lozenges without Local Anesthetics  Unknown Types of Cough and Cold Preparation |
| Diabetic Medications | Insulin  Oral Hypoglycemics: Biguanides  Oral Hypoglycemics: Sulfonylureas  Oral Hypoglycemics: Thiazolidinediones  Oral Hypoglycemics: Other or Unknown |
| Diuretics | Furosemide  Other Types of Diuretic  Thiazide  Unknown Types of Diuretic |
| Gastrointestinal Medications | Antacids: Other Types  Antacids: PPI  Antacids: Salicylate-Containing  Anticholinergic Drugs (Excluding Cough and Cold Preparations, and Plants)  Antidiarrheals: Diphenoxylate and Atropine Containing  Antidiarrheals: Loperamide  Antispasmodics: Anticholinergic Containing  Antispasmodics: Other Types  Cimetidine and Other Histamine-2 Blockers  Laxatives  Other types of GI preparation  Unknown Types of Gastrointestinal Preparation |
| Hematology & Oncology Medications | Heparins  Warfarin (Excluding Rodenticides)  Other Antiplatelets  Other Types of Anticoagulant  Unknown Types of Anticoagulant  Antineoplastic Drugs |
| Hormones | Androgens  Androgen or Androgen Precursor Dietary Supplements  Estrogens  Progestins  Oral Contraceptives  Selective Estrogen Receptor Modulators  Other Hormone Antagonists  Other Hormones  Unknown Hormones or Hormone Antagonists |
| Laundry and Dish Detergents | Laundry Detergents: Liquids (Unit Dose)  Laundry Detergents: Liquids (Various Containers)  Laundry Detergents: Granules (Various Containers)  Laundry Prewash/Stain Removers: Liquid Solvent Based  Laundry Detergent Boosters  Laundry Detergents: Other or Unknown Types of Household Laundry Detergent and/or Fabric Cleaner  Laundry Prewash/Stain Removers: Other or Unknown  Laundry Prewash/Stain Removers: Liquid Surfactant Based  Laundry Detergents: Granules with Liquids (Unit Dose)  Other or Unknown Laundry Additives or Miscellaneous Products  Laundry Detergents: Soaps  Laundry Prewash/Stain Removers: Aerosol or Spray Solvent Based  Enzyme and/or Microbiological Laundry Additives  Laundry Detergents: Granules (Unit Dose)  Laundry Prewash/Stain Removers: Aerosol or Spray Surfactant Based  Automatic Dishwasher Detergents: Liquids (Various Containers)  Automatic Dishwasher Detergents: Granules with Liquids (Unit Dose)  Automatic Dishwasher Detergents: Tablets  Automatic Dishwasher Rinse Agents  Automatic Dishwasher Detergents: Granules (Various Containers)  Automatic Dishwasher Detergents: Liquids (Unit Dose)  Automatic Dishwasher Detergents: Granules (Unit Dose)  Other or Unknown Types of Automatic Dishwasher Detergent  Fabric Softeners/Antistatic Agents: Liquid (Various Containers)  Fabric Softeners/Antistatic Agents: Dry or Powder (Unit Dose)  Anionic or Nonionic Hand Dishwashing Detergents  Other or Unknown Types of Household Hand Dishwashing Detergent |
| Muscle Relaxants | Baclofen  Carisoprodol (Formulated Alone)  Cyclobenzaprine  Metaxalone  Methocarbamol  Tizanidine  Other muscle relaxant  Unknown Types of Muscle Relaxant |
| Narcotics | Acetaminophen, Acetylsalicylic Acid, and Opioid Combinations with Decongestant and/or Antihistamine without Phenylpropanolamine Acetaminophen and Codeine Combinations with Decongestant and/or Antihistamine without Phenylpropanolamine  Acetaminophen with Codeine  Acetaminophen with Hydrocodone  Acetaminophen with Other Narcotics or Narcotic Analogs  Acetaminophen and Other Opioid Combinations with Decongestant and/or Antihistamine without Phenylpropanolamine  Acetaminophen with Oxycodone  Acetaminophen with Propoxyphene  Acetylsalicylic Acid with Codeine  Acetylsalicylic Acid with Oxycodone  Antihistamine and/or Decongestant with Codeine without Phenylpropanolamine  Antihistamine and/or Decongestant with Other Opioid without Phenylpropanolamine  Buprenorphine  Codeine  Fentanyl  Hydrocodone Alone or in Combination (Excluding Combination Products with Acetaminophen, Acetylsalicylic Acid or Ibuprofen)  Hydromorphone  Ibuprofen with hydrocodone  Meperidine  Methadone  Miscellaneous Narcotic Antagonist  Morphine  Nalbuphine  Non-Acetylsalicylic Acid Salicylates and Opioid Combinations with Decongestant and/or Antihistamine without Phenylpropanolamine  Other or Unknown Narcotics  Oxycodone alone or in combination (excluding combination products with acetaminophen or ASA)  Oxymorphone  Pentazocine  Propoxyphene  Tapentadol  Tramadol |
| Nonsteroidal Anti-Inflammatory Drugs | Acetylsalicylic Acid  Acetylsalicylic Acid in Combination with Other Drugs, Adult Formulations  Acetylsalicylic Acid with Carisoprodol  Acetylsalicylic Acid with Decongestant and/or Antihistamine Combinations without Phenylpropanolamine or Opioids  Camphor and Methyl Salicylate Combinations  Colchicine  Cyclooxygenase-2 Inhibitors  Ibuprofen  Ibuprofen with diphenhydramine  Indomethacin  Ketoprofen  Methyl Salicylate  Naproxen  Non-Acetylsalicylic Acid Salicylates in Combination with Dextromethorphan  Non-Aspirin Salicylates (Excluding Topicals and/or Gastrointestinal Drugs)  Other Types of Nonsteroidal Anti-inflammatory Drug  Unknown Types of Nonsteroidal Anti-inflammatory Drug |
| Nutrients, Vitamins, Minerals | Asian Medicines  Ayurvedic Medicines  Barium, Soluble Salts  Calcium and Calcium Salts  Cinnamon Oil  Clove Oil  Echinacea  Eucalyptus Oil  Fluoride (Excluding Vitamins, Hydrofluoric Acid & Mouthwashes)  Ginkgo Biloba  Ginseng  Glandular Dietary Supplements  Glucosamine (with or without Chondroitin)  Homeopathic Agents  Iron and Iron Salts (Excluding Vitamins with Iron)  Ma Huang/Ephedra (Single Ingredient)  Magnesium and Magnesium Salts  Melatonin  Miscellaneous Essential Oils  Multi-Botanicals with Ma Huang  Multi-Botanicals without Ma Huang or Citrus Aurantium  Multi-Mineral and Multi-Herbal Dietary Supplement  Multi-Mineral Dietary Supplements  Multiple Vitamin Liquids: Adult Formulations with Iron (No Fluoride)  Multiple Vitamin Liquids: Adult Formulations without Iron or Fluoride  Multiple Vitamin Liquids: Pediatric Formulations with Iron (No Fluoride)  Multiple Vitamin Liquids: Pediatric Formulations without Iron or Fluoride  Multiple Vitamin Tablets: Adult Formulations with Iron (No Fluoride)  Multiple Vitamin Tablets: Adult Formulations with Iron and Fluoride  Multiple Vitamin Tablets: Adult Formulations with Iron Carbonyl (No Fluoride)  Multiple Vitamin Tablets: Adult Formulations without Iron or Fluoride  Multiple Vitamin Tablets: Pediatric Formulations with Fluoride (No Iron)  Multiple Vitamin Tablets: Pediatric Formulations with Iron (No Fluoride)  Multiple Vitamin Tablets: Pediatric Formulations without Iron or Fluoride  Multiple Vitamins, Unspecified Adult Formulations with Iron (No Fluoride)  Multiple Vitamins, Unspecified Adult Formulations with Iron and Fluoride  Multiple Vitamins, Unspecified Adult Formulations without Iron or Fluoride  Multiple Vitamins, Unspecified Pediatric Formulations without Iron or Fluoride  Other Amino Acid Dietary Supplements  Other B Complex Vitamins  Other Cultural Medicines  Other Types of Vitamin  Pennyroyal Oil  Phytoestrogen Dietary Supplements  Potassium and Potassium salts  Selenium and Selenium Salts  Sodium and Sodium Salts  St. John's Wort  Tea Tree Oil  Unknown Dietary Supplements or Homeopathic Agents  Unknown Types of Vitamin  Vitamin A  Vitamin B3 (Niacin)  Vitamin B6 (Pyridoxine)  Vitamin C  Vitamin D  Vitamin E  Valerian  Yohimbe  Zinc and Zinc Salts |
| Recreational drugs | Chewing Tobacco  Cigarettes  Cocaine  Creatine  eCigarettes: Nicotine Device Without Added Flavors  eCigarettes: Nicotine Liquid Flavor Unknown  eCigarettes: Nicotine Liquid Without Added Flavors  Group 1 Mushrooms: Cyclopeptides  Group 2 Mushrooms: Muscimol (Ibotenic Acid)  Group 3 Mushrooms: Monomethylhydrazine (MMH)  Group 4 Mushrooms: Muscarine and Histamine  Group 6 Mushrooms: Hallucinogenics (Psilocybin and Psilocin)  Group 7 Mushrooms: Gastrointestinal Irritants  Hallucinogenic Amphetamines  Heroin  Lysergic acid diethylamide (LSD)  Marijuana  Mescaline/Peyote  Methamphetamines  Mushrooms: Unknown  Nicotine (Excluding Tobacco Products)  Nicotine Pharmaceuticals  Other Hallucinogens  Other Street Drugs  Phenylcyclohexylpiperidine (PCP)  Snuff  Tetrahydrocannabinol (THC) Homologs  Tetrahydrocannabinol (THC) Pharmaceuticals  Unknown Hallucinogens  Unknown Stimulants or Street Drugs  Unknown Types of Tobacco Product |
| Stimulants | Acetaminophen, Acetylsalicylic Acid, Phenylpropanolamine, and Dextromethorphan Combinations with Decongestant and/or Antihistamine  Acetaminophen and Phenylpropanolamine Combinations with Decongestant and/or Antihistamine without Opioid  Acetaminophen, Phenylpropanolamine, and Dextromethorphan Combinations with Decongestant and/or Antihistamine  Amphetamines and Related Compounds  Antihistamine and/or Decongestant with Phenylpropanolamine and Dextromethorphan  Antihistamine and/or Decongestant with Phenylpropanolamine without Opioid  Caffeine  Diet Aids: Phenylpropanolamine Only  Energy Drinks: Caffeine Containing (From Any Source Including Guarana, Kola Nut, Tea, Yerba Mate, Cocoa, etc.)  Energy Drinks: Caffeine Only (Without Guarana, Kola Nut, Tea, Yerba Mate, Cocoa, etc.)  Energy Drinks: Ethanol and Caffeine Containing (From Any Source Including Guarana, Kola Nut, Tea, Yerba Mate, Cocoa, etc.)  Energy Drinks: Unknown  Energy Products: Other  Ephedrine  Methylphenidate  Other Phenylpropanolamine Preparations (Excluding Street Drugs and Diet Aids)  Other Stimulants (Excluding Amphetamines) |
| Thyroid Medications | Thyroid Preparations (Including Synthetics and Extracts) |
| TylenolTM | Acetaminophen  Acetaminophen with Diphenhydramine  Acetaminophen and Acetylsalicylic Acid without Other Ingredients  Acetaminophen in Combination with Other Drugs, Adult Formulations  Acetaminophen and Acetylsalicylic Acid with Other Ingredients  Acetaminophen with Decongestant and/or Antihistamine Combinations without Phenylpropanolamine or Opioids  Acetaminophen and Dextromethorphan Combinations with Decongestant and/or Antihistamine without Phenylpropanolamine  Acetaminophen in Combination with Dextromethorphan (Without Decongestants or Antihistamines)  Acetaminophen, Acetylsalicylic Acid, and Dextromethorphan Combinations with Decongestant and/or Antihistamine without Phenylpropanolamine  Acetaminophen and Acetylsalicylic Acid with Decongestant and/or Antihistamine Combinations without Phenylpropanolamine or Opioids  Acetaminophen and Dextromethorphan with Decongestant and Antihistamine |
| Miscellaneous 1: Pesticides, Herbicides, Fertilizer | Organophosphate Insecticides Alone  Pyrethrins  Chlorinated Hydrocarbon Insecticides Alone  Carbamate Insecticides Alone  Long-Acting Anticoagulant Rodenticides  Unknown Types of Insecticide  Bromethalin Rodenticides  Pyrethroids  Unknown Types of Rodenticide  Other Types of Insecticide  Other Types of Rodenticide  Zinc Phosphide Rodenticides  Organophosphate Insecticides in Combination with Non-Carbamate Insecticides  Strychnine Rodenticides  Paradichlorobenzene Moth Repellants (Excluding Deodorizing Products)  Warfarin Type Anticoagulant Rodenticides  Algicides  Urea Herbicides  Carbamate Fungicides  Other Types of Non-Medicinal Fungicide  Outdoor Fertilizers  Triazine Herbicides  Unknown Types of Herbicide  Other Types of Fertilizer  Chlorophenoxy Herbicides  Other Types of Herbicide  Unknown Types of Fertilizer  Glyphosate  Diquat  Unknown Types of Moth Repellant  Unknown Types of Non-Medicinal Fungicide  Insect Repellents without DEET  Insect Repellents with DEET  Naphthalene Moth Repellants |
| Miscellaneous 2: Disc Batteries | Disc Batteries: Unknown  Disc Batteries: Lithium  Disc Batteries: Zinc-Air |
| Miscellaneous 3: Other Medications and Pharmaceuticals | Camphor  Calamine (Including All Caladryl Type Products)  Other Types of Rubefacient or Liniment (Excluding Camphor and Methyl Salicylate)  Glaucoma Medications  Other Types of Otic Preparation  Tetrahydrozoline, Nasal Preparations  Disulfiram  gamma-Hydroxybutyric Acid including Analogs or Precursors  Minoxidil, Topical  Tetrahydrozoline, Ophthalmic Preparations  Other Types of Ophthalmic Preparation  Other Ophthalmic Sympathomimetics  Unknown Types of Ophthalmic Preparation  Podophyllin  Ergot Alkaloids  Allopurinol  Levo-Dopa and Related Drugs  Neuromuscular Blocking Agents (Succinylcholine, Curare, etc.)  Nitrates and Nitrites (Excluding Medications and Substances of Abuse)  Nitrous Oxide  Miscellaneous Unknown Drugs  Misc unknown drugs  Other Types of Miscellaneous Prescription or Over the Counter Drug  Other Types of Diet Aid, Over the Counter Only  Other Types of Diet Aid, Prescription Only  Unknown Types of Diet Aid  Wart Preparations and Other Keratolytics |
| Miscellaneous 4: Metals | Other Types of Heavy Metal  Unknown Types of Heavy Metal  Mercury, Elemental (Excluding Thermometer)  Arsenic (Excluding Pesticides)  Thermometers: Mercury  Mercury (Other)  Lead  Aluminum Phosphide  Aluminum  Manganese  Copper  Chromium, Trivalent  Silver Nitrate  Colloidal Silver  Soldering Flux |
| Miscellaneous 5: Nonpharmaceuticals,  Household and Industrial Products | Hair Rinses, Conditioners, Relaxers  Toilet Bowl Cleaners: Other or Unknown  Miscellaneous Cleaning Agents: Other or Unknown Household Cleaning Agents  Miscellaneous Cleaning Agents: Anionics or Nonionics  Ammonia (Excluding Cleaning Agents)  Disinfectants: Hypochlorite (Non-Bleach Products)  Other Types of Swimming Pool or Aquarium Product  Swimming Pool and Aquarium Test Kits  Oven Cleaners: Other or Unknown  Bleaches: Hypochlorite (Liquid and Dry)  Anionic or Nonionic Cleansers  Peroxides  Other Types of Swimming Pool or Aquarium Product  Industrial Cleaners: Anionics or Nonionics  Carpet, Upholstery, Leather, or Vinyl Cleaners  Waterproofers/sealants: aerosols  Glass Cleaners: Ammonia Containing  Industrial Cleaner: Disinfectants  Drain Cleaners: Other or Unknown  Other or Unknown Types of Household Cleanser  Wall/Floor/Tile/All-Purpose Cleaning Agents: Other or Unknown  Industrial Cleaner: Other or Unknown  Industrial Cleaners: Cationics  Ammonia Cleaners (All Purpose)  Wall/Floor/Tile/All-Purpose Cleaning Agents: Cationics  Miscellaneous Cleaning Agents: Cationics  Other Hair Care Products (Excluding Peroxides)  Bleaches: Non-Hypochlorite  Hair Relaxers (with Sodium Hydroxide)  Glass Cleaners: Other or Unknown Types of Household  Waterproofers/sealants: liquids  Spot Removers/Dry Cleaning Agents: Anionics or Nonionics  Spot Removers/Dry Cleaning Agents: Perchloroethylene  False Teeth Cleaning Agents  Spot Removers/Dry Cleaning Agents: Other Hydrocarbon and/or Non-Halogenated Containing  Hand Sanitizers: Non-Alcohol Based  Hydrogen Peroxide 3%  Bleaches: Other or Unknown (Household)  Other Types of Stripping Agent  Disinfectants: Pine Oil  Permanent Wave Solutions  Bleaches: Borates  Air Fresheners: Unknown Form  Other Nail Polish Removers  Depilatories  Air Fresheners: Liquids  Miscellaneous Nail Products  Wall/Floor/Tile/All-Purpose Cleaning Agents: Anionics or Nonionics  Other Types of Deodorizer (Not for Personal Use)  Disinfectants: Other or Unknown  Hair Relaxers (with Other Non-Alkalines)  Automotive/Aircraft/Boat Products: Unknown  Lacrimators: Capsicum Defense Sprays  Lacrimators: Unknown  Automotive/Aircraft/Boat Products: Other  Lacrimators: CN (Chloroacetophenone)  Unknown Types of Deodorizer (Not for Personal Use)  Unknown Types of Stripping Agent  Methylene Chloride Stripping Agents  Toilet Bowl Deodorizers  Turpentine  Toluene Diisocyanate  Lubricating Oils and/or Motor Oils  Baby Oils  Toluene and/or Xylene (Excluding Adhesives)  Nail Polishes  Artist Paints (Non-Water Color)  Bath Oils and/or Bubble Baths  Acrylic Nail Adhesives  Nail Polish Removers (Acetone Containing)  Unknown Nail Polish Removers  Furniture Polishes  Other Types of Hydrocarbon  Floor Waxes, Polishes, or Sealers  Oil-Based Paints  Lamp Oils  Miscellaneous Polishes and Waxes (Excluding Mineral Seal Oils)  Gasolines  Hair Oils  Lighter Fluids and/or Naphtha  Unknown Types of Hydrocarbon  Automotive Products: Brake Fluids  Varnishes and Lacquer  Benzene  Automotive Products: Hydrocarbons (Transmission Fluids, Power Steering Fluids, etc.)  Mineral Spirits  Diesel Fuels  Acetone (Excluding Nail Polish Removers)  Ketones  Kerosenes  Cyanoacrylates (Superglues, etc.)  Acne Preparations  Perfumes, Colognes, and Aftershaves  Water Base Paints (Acrylic, Latex, etc.)  Crayons  Mouthwashes: Unknown  Creams, Lotions, and Make-Up  Soaps (Bar, Hand or Complexion)  Powders Made of Talc  Penlight/Flashlight/Dry Cell Batteries  Desiccants  Coins  Clays  Diaper Care and Rash Products  Fireworks  Matches  Bubble Blowing Solutions  Toothpastes (with Fluoride)  Glass  Other Types of Arts/Crafts/Writing Products  Suntan and/or Sunscreen Products  Deodorants  Pencils  Air Fresheners: Aerosols  Hair Sprays  Hair Coloring Agents (Excluding Peroxides)  Other Dental Care Products (Excluding Fluoride Supplements)  Eye Products  Pens or Inks  Toys  Feces/Urine  Other Types of Photographic Product  Air Fresheners: Solids  Glow Products  Artist Paints (Water Color)  Mouthwashes: Fluoride Containing  Contact Lens Products  Mouthwashes: Non Ethanol Containing  Non-Toxic Adhesives/Glues (White Glue, Paper Glue, etc.)  Lipsticks and Lip Balms (without Camphor)  Other Types of Battery  Unknown Types of Arts/Crafts/Writing Products  Simple Asphyxiants  Other Types of Foreign Body, Toy, or Miscellaneous Substance  Charcoals  Ashes  Carbon Dioxide  Soil  Caulking Compounds and Construction Putties  Cement or Concrete (Excluding Glues)  Unknown Types of Foreign Body, Toy, or Miscellaneous Substance  Methane and Natural Gas  Acrylic Nail Primers  Aquarium Products, Miscellaneous  Chlorine Gas (When Household Acid is Mixed with Hypochlorite)  Douches  Freon and Other Propellants  Incense (Punk)  Miscellaneous Fire Extinguishers  Miscellaneous Serums, Toxoids and Vaccines  Other Chemicals  Other Non-Drug Substances  Other Single Ingredient Botanicals  Other Single Ingredient Non-Botanical Dietary Supplements  Other Suspicious Powders  Other Suspicious Substances (Non-Powder)  Other Types of Diagnostic Agent  Other Types of Fume, Gas or Vapor  Powders Made of Material Other Than Talc  Typewriter Correction Fluids  Unknown Chemicals  Unknown Substances Unlikely to be Drug Products  Unknown Types of Adhesive, Glue, Cement or Paste  Unknown Types of Paint, Varnish or Lacquer  Combination Products  Strychnine (Excluding Rodenticides)  Miscellaneous Veterinary Drugs without Human Equivalent  Hunting Products, Miscellaneous  Other Types of Building or Construction Products  Other Chemical Weapons  Gun Bluing Compounds  Formaldehyde or Formalin  Wood Preservatives  Thermometers: Other  Hydrogen Sulfide (Sewer Gas)  Chlorine Shock Treatments  Bromine Shock Treatments  Unknown Types of Fume, Gas or Vapor  Suspicious Powders in Envelope or Package  Nonpharmaceutical Radiation: Type Unknown  Other Types of Insulation  Explosives  Methylene Chloride (Excluding Paint Strippers)  Chlorates (Excluding Matches and Fireworks)  Chloramine Gas  Chlorine Gas  Other Biological Weapons  Blue-Green Algae  Carbon Monoxide  Cyanides (Excluding Rodenticides)  Dyes: Unknown  Dyes: Other  Bacterial Diseases  Fungal Diseases |
